# Supplementary material for: Friedel–Crafts-type reactions with ureas and thioureas
Source: Royal Society of Chemistry journal article supplement (doi:10.1039/c2cc34062c), 2012-01-01
Supplement: c2cc34062c.pdf [file c2cc34062c.pdf]

## Friedel-Crafts-type reactions with ureas and thioureas.

Erum K. Raja<sup>a</sup>, Daniel J. DeSchepper<sup>a</sup>, Sten O. Nilsson Lill<sup>b</sup>, and Douglas Klumpp<sup>a,\*</sup>

<sup>a</sup>Department of Chemistry and Biochemistry, Northern Illinois University, DeKalb IL 60115, United States. <sup>b</sup>Department of Chemistry, University of Gothenburg, SE-412 96 Gothenburg, Sweden.

|             |                                                                         |
|-------------|-------------------------------------------------------------------------|
| S-1         | Index                                                                   |
| S-2 – S-4   | Experimental procedures and characterization data                       |
| S-5 – S-18  | <sup>1</sup> H NMR and <sup>13</sup> C NMR spectra of unknown compounds |
| S-19        | Computational methods and references to these                           |
| S-20 – S-28 | Cartesian coordinates of compounds discussed in the manuscript          |

## Experimental Methods:

**General.** All reactions were performed using oven-dried glassware under an argon atmosphere. Trifluoromethanesulfonic acid was freshly distilled prior to use. All commercially available compounds and solvents were used as received.  $^1\text{H}$  NMR and  $^{13}\text{C}$  NMR were done either using a Bruker 300 or 500 MHz spectrometer. Low-resolution mass spectra were obtained from a gas chromatography instrument equipped with a mass-selective detector, while high-resolution mass spectra were obtained from a commercial analytical laboratory. Compounds **1**, **2**, **10-11**, **14-15**, **17**, **18**, **21**, **23**, **30**, and **33-34** are available from commercial suppliers or known from previous literature reports.

**Urea synthesis, general procedure A:** The appropriate amine (1 mmol) is added to a cooled solution (0 °C) of aryl isocyanate (1 mmol) in anhydrous THF (15 mL). The mixture is stirred for 12 hours at 25 °C, after which the products are partitioned between ethyl acetate water. The organic solution is further washed with  $\text{H}_2\text{O}$ , brine (2x) and dried over anhydrous sodium sulfate. Most urea products are formed in >95% purity and may be used in the subsequent reaction. However, further purification may be accomplished via column chromatography (hexane:ethyl acetate).

**3,4-Dihydroisoquinolin-1(2*H*)-one and 3,4-dihydroisoquinolin-1(2*H*)-thione synthesis, general procedure B:** Trifluoromethanesulfonic acid (1.4 mL, 16 mmol) is added to a solution of urea or thiourea (1 mmol) in anhydrous  $\text{CH}_2\text{Cl}_2$  (2 mL). The mixture is stirred in a sealed vessel under argon for 12 hrs at 50 °C and then poured over ice. The products are extracted into  $\text{CHCl}_3$  and the organic solution is washed with  $\text{H}_2\text{O}$  (2x), brine (2x) and dried over anhydrous sodium sulfate. The crude product is isolated and purified via column chromatography (hexane:ethyl acetate). Chloroform (without ethanol preservative) or 1,2-dichloroethane may also be used as solvents for the reactions.

**Amide and thioamide synthesis (intermolecular), general procedure C:** Trifluoromethanesulfonic acid (1.4 mL, 16 mmol) is added to a solution of urea **27** or **28** (1 mmol) in benzene (2 mL). The mixture is stirred for 12 hrs at 50 °C and then poured over ice. The products are extracted into  $\text{CHCl}_3$  and the organic solution is washed with  $\text{H}_2\text{O}$  (2x), brine (2x) and dried over anhydrous sodium sulfate. The crude product is isolated and purified via column chromatography (hexane:ethyl acetate).

**Procedure for the Preparation of Compound 9:** 2-Nitrophenyl isocyanate (0.16 g, 1 mmol) is added to a cooled solution (0 °C) of (*S*)-2-amino-3-phenyl-1-propanol (0.15 g, 1 mmol) anhydrous THF (20 mL). The solution is stirred for 12 hrs at 25 °C, after which it is partitioned between cold water and  $\text{CHCl}_3$ . The organic layer is separated, washed with  $\text{H}_2\text{O}$  (2x), brine (2x) and dried over anhydrous sodium sulfate. The crude product is isolated and purification is done via column chromatography (hexane:ethyl acetate). The resulting alcohol product is dissolved in anhydrous  $\text{CH}_2\text{Cl}_2$  (20 mL) and triethylamine (0.21 mL, 1.5 mmol) is added. To this solution, 6-chloronicotinoyl chloride (0.176 g, 1 mmol) is added and the mixture is stirred for 12 hrs at 25°C. The resulting mixture is then poured over ice/water and partition between water and  $\text{CHCl}_3$ . The organic solution is washed with  $\text{H}_2\text{O}$  (2x), brine (2x) and dried over anhydrous sodium sulfate. The crude product is isolated and purified via column chromatography (hexane:ethyl acetate).

**1-(2-nitrophenyl)-3-phenethylurea (2):** yellow solid, mp = 115-117°C.  $^1\text{H}$  NMR ( $\text{CDCl}_3$ , 300 MHz)  $\delta$  2.90 (t, 2H,  $J$  = 6.9 Hz), 3.57 (q, 2H,  $J$  = 6.9 Hz), 5.78 (s, 1H), 7.03 (t, 1H,  $J$  = 8.1 Hz), 7.18-7.33 (m, 5H), 7.58 (t, 1H,  $J$  = 8.1 Hz), 8.14 (d, 1H,  $J$  = 8.7 Hz), 8.63 (d, 1H,  $J$  = 8.7 Hz), 9.74 (s, 1H).  $^{13}\text{C}$  NMR

(CDCl<sub>3</sub>, 300 MHz)  $\delta$  36.1, 41.8, 121.3, 121.6, 125.7, 126.5, 128.6, 128.8, 135.4, 135.9, 137.2, 138.8, 154.3. Low-resolution mass spectrum (EI), *m/z*: 285 (M<sup>+</sup>), 267, 194, 138, 91. High-resolution mass spectrum, C<sub>15</sub>H<sub>15</sub>O<sub>3</sub>N<sub>3</sub> calcd, 285.11135, found 285.11054.

**1-(4-methylphenethyl)-3-(4-nitrophenyl)urea (4):** beige solid, mp = 153-155°C. <sup>1</sup>H NMR ((CD<sub>3</sub>)<sub>2</sub>CO, 300MHz)  $\delta$  2.28 (s, 3H), 2.80 (t, 2H, *J* = 7.2 Hz), 3.45-3.51 (m, 2H), 6.05(s, 1H), 7.12-7.16 (m, 4H), 7.70-7.73 (m, 2H), 8.12-8.15 (m, 2H), 8.67 (s, 1H). <sup>13</sup>C NMR ((CD<sub>3</sub>)<sub>2</sub>CO, 300MHz)  $\delta$  20.1, 35.5, 41.2, 117.0, 124.8, 128.6, 129.0, 135.4, 136.4, 141.4, 147.2, 154.3. High-resolution (TOF) mass spectrum, C<sub>16</sub>H<sub>18</sub>O<sub>3</sub>N<sub>3</sub> (MH<sup>+</sup>) calcd, 300.1348, found 300.1350.

**1-(4-ethylphenethyl)-3-(4-nitrophenyl)urea (5):** yellow solid, mp = 125-127°C. <sup>1</sup>H NMR ((CD<sub>3</sub>)<sub>2</sub>CO, 300MHz)  $\delta$  1.19 (t, 3H, *J* = 7.5 Hz), 2.60(q, 2H, *J* = 7.5 Hz), 2.81 (t, 2H, *J* = 7.2 Hz), 3.45-3.52 (m, 2H), 6.08 (s, 1H), 7.14-7.15 (m, 4H), 7.70-7.73 (m, 2H), 8.12-8.15 (m, 2H), 8.67 (s, 1H). <sup>13</sup>C NMR ((CD<sub>3</sub>)<sub>2</sub>CO, 300MHz)  $\delta$  15.2, 28.1, 35.6, 41.2, 117.0, 124.8, 127.8, 128.7, 136.6, 141.3, 141.9, 147.1, 154.4. High-resolution (TOF) mass spectrum, C<sub>17</sub>H<sub>20</sub>O<sub>3</sub>N<sub>3</sub> (MH<sup>+</sup>) calcd, 314.1505, found 314.1503.

**1-(2-(biphenyl-4-yl)ethyl)-3-(4-nitrophenyl)urea (6):** yellow solid, mp = 168-170°C. <sup>1</sup>H NMR ((CD<sub>3</sub>)<sub>2</sub>CO, 300 MHz)  $\delta$  2.88-2.94 (m, 2H), 3.56 (q, 2H, *J* = 7.5 Hz), 6.13 (s, 1H), 7.34-7.48 (m, 5H), 7.58-7.66 (m, 4H), 7.71-7.75 (m, 2H), 8.13-8.16 (m, 2H), 8.68 (s, 1H). <sup>13</sup>C NMR ((CD<sub>3</sub>)<sub>2</sub>CO, 300MHz)  $\delta$  35.58, 41.08, 117.04, 124.83, 126.65, 126.88, 127.14, 128.82, 129.34, 138.77, 138.90, 140.70, 141.33, 147.14, 154.39. High-resolution (TOF) mass spectrum, C<sub>21</sub>H<sub>20</sub>O<sub>3</sub>N<sub>3</sub> (MH<sup>+</sup>) calcd, 362.1505, found 362.1504.

**1-(4-nitrophenyl)-3-(2-phenylpropyl)urea (7):** yellow solid, mp = 171-174°C. <sup>1</sup>H NMR ((CD<sub>3</sub>)<sub>2</sub>CO, 300MHz)  $\delta$  1.27(d, 3H, *J* = 6.9 Hz), 2.96-3.04 (m, 1H), 3.34-3.55 (m, 2H), 7.22-7.34 (m, 5H), 7.66-7.71 (m, 2H), 8.11-8.14 (m, 2H), 8.62 (s, 1H). <sup>13</sup>C NMR ((CD<sub>3</sub>)<sub>2</sub>CO, 300MHz)  $\delta$  18.9, 40.0, 46.4, 117.0, 124.8, 126.4, 127.2, 128.5, 141.3, 144.7, 147.1, 154.4. High-resolution (TOF) mass spectrum, C<sub>16</sub>H<sub>18</sub>O<sub>3</sub>N<sub>3</sub> (MH<sup>+</sup>) calcd, 300.1348, found 300.1345.

**1-(1-hydroxy-3-phenylpropan-2-yl)-3-(2-nitrophenyl)urea (8):** yellow solid, mp = 137-138°C. <sup>1</sup>H NMR ((CD<sub>3</sub>)<sub>2</sub>CO, 300 MHz)  $\delta$  2.83-3.03 (m, 2H), 3.61(dd, 2H, *J* = 1.8, 4.8 Hz), 4.02-4.16 (m, 2H), 7.09 (dt, 2H, *J* = 1.5, 7.2 Hz), 7.18-7.21 (m, 1H), 7.25-7.33 (m, 4H), 7.62 (dt, 1H, *J* = 1.8, 7.2 Hz), 8.11 (dd, 1H, *J* = 1.5, 8.4 Hz), 8.61 (dd, 1H, *J* = 1.5, 8.7 Hz), 9.55 (s, 1H). <sup>13</sup>C NMR ((CD<sub>3</sub>)<sub>2</sub>CO, 300MHz)  $\delta$  37.2, 53.7, 63.0, 120.8, 121.6, 125.3, 126.0, 128.2, 129.3, 135.1, 135.9, 137.1, 139.1, 154.0. High-resolution mass spectrum, C<sub>16</sub>H<sub>17</sub>O<sub>4</sub>N<sub>3</sub> calcd, 315.12191, found 315.12002.

**2-(3-(2-nitrophenyl)ureido)-3-phenylpropyl 6-chloronicotinate (9):** yellow oily solid, <sup>1</sup>H NMR (CDCl<sub>3</sub>, 300 MHz)  $\delta$  2.96-3.12 (m, 2H), 4.36-4.59 (m, 3H), 5.65 (d, 1H, *J* = 8.4 Hz), 7.05 (dt, 1H, *J* = 1.2, 7.2 Hz), 7.22-7.40 (m, 4H), 7.58 (dt, 1H, *J* = 1.5, 7.2 Hz), 8.12 (dd, 1H, *J* = 1.5, 8.4 Hz), 8.20 (dd, 1H, *J* = 2.4, 8.4 Hz), 8.55 (dd, 1H, *J* = 1.2, 8.7 Hz), 8.98 (d, 1H, *J* = 1.8 Hz), 9.72 (s, 1H). <sup>13</sup>C NMR (CDCl<sub>3</sub>, 300 MHz)  $\delta$  37.9, 50.7, 66.3, 121.5, 121.6, 124.3, 124.6, 125.7, 127.0, 128.8, 129.2, 135.4, 136.0, 136.7, 136.7, 139.7, 151.8, 153.6, 155.9, 164.4. Low-resolution mass spectrum (EI), *m/z*: 297, 273, 199, 140, 91. High-resolution mass spectrum (CI), C<sub>22</sub>H<sub>20</sub>O<sub>5</sub>N<sub>4</sub>Cl calcd, 455.1122, found 455.1120.

**7-ethyl-3,4-dihydroisoquinolin-1(2H)-one (12):** <sup>1</sup>H NMR (CDCl<sub>3</sub>, 500MHz)  $\delta$  1.26 (t, 3H, *J* = 7.5 Hz), 2.69 (q, 2H, *J* = 7.5 Hz), 2.97 (t, 2H, *J* = 7), 3.57 (dt, 2H, *J* = 2, 6.5 Hz), 6.65 (s, 1H), 7.15-7.16 (m, 1H),

7.28-7.32 (m, 1H), 7.92 (m, 1H).  $^{13}\text{C}$ NMR ( $\text{CDCl}_3$ , 500MHz)  $\delta$  15.5, 27.9, 28.5, 40.3, 127.2, 127.3, 128.6, 131.9, 136.1, 143.3, 166.8. Low Resolution Mass Spectra (EI);  $m/z$ : 175, 160, 146, 131, 118, 103, 91, 77, 65, 51. High-resolution mass spectrum,  $\text{C}_{11}\text{H}_{13}\text{ON}$  calcd, 175.09972, found 175.10030.

**7-phenyl-3,4-dihydroisoquinolin-1(2H)-one (13):**  $^1\text{H}$  NMR ( $\text{CDCl}_3$ , 500MHz)  $\delta$  3.06 (t, 2H,  $J = 6.5$  Hz), 3.62 (dt, 2H,  $J = 2.5, 6.5$  Hz), 6.46 (s, 1H), 7.28-7.39 (m, 2H), 7.45-7.48 (m, 2H), 7.65-7.67 (m, 2H), 7.72 (dd, 1H,  $J = 2.0, 8.0$  Hz), 8.35 (d, 1H,  $J = 2.0$  Hz).  $^{13}\text{C}$  NMR ( $\text{CDCl}_3$ , 500 MHz)  $\delta$  28.0, 40.3, 126.5, 127.0, 127.6, 127.8, 128.8, 129.2, 130.7, 137.7, 140.0, 140.2, 166.4. Low Resolution Mass Spectra (EI);  $m/z$ : 223, 204, 194, 178, 166, 152, 139, 115, 97, 82, 63. High-resolution mass spectrum,  $\text{C}_{15}\text{H}_{13}\text{ON}$  calcd, 223.09972, found 223.09951.

**(1-oxo-1,2,3,4-tetrahydroisoquinolin-3-yl)methyl 6-chloronicotinate (16):** yellow oily solid,  $^1\text{H}$  NMR ( $\text{CDCl}_3$ , 500 MHz)  $\delta$  2.96-3.01 (m, 1H), 3.19-3.23 (m, 1H), 4.17-4.19 (m, 1H), 4.41-4.44 (m, 1H), 4.51-4.55 (m, 1H), 7.23-7.24 (m, 1H), 7.32-7.37 (m, 2H), 7.48 (dt, 1H,  $J = 1.0, 7.5$  Hz), 7.73 (s, 1H), 7.95 (dd, 1H,  $J = 1.5, 8.0$  Hz), 8.18 (dd, 1H,  $J = 2.5, 8.5$  Hz), 8.95 (d, 1H,  $J = 2.0$  Hz).  $^{13}\text{C}$  NMR ( $\text{CDCl}_3$ , 500 MHz)  $\delta$  30.2, 49.8, 67.2, 124.1, 124.4, 127.3, 127.6, 127.9, 128.2, 132.6, 136.5, 136.7, 151.3, 156.0, 164.2, 166.2. High-resolution mass spectrum (CI),  $\text{C}_{16}\text{H}_{14}\text{O}_3\text{N}_2\text{Cl}$  calcd, 317.0693, found 317.0691.

**1-(4-methylphenethyl)-3-(4-nitrophenyl)thiourea (19):** oily yellow solid.  $^1\text{H}$  NMR ( $(\text{CD}_3)_2\text{CO}$ , 300 MHz)  $\delta$  2.30 (s, 3H), 2.95 (t, 2H,  $J = 7.5$  Hz), 3.85-3.91 (m, 2H), 7.11-7.19 (m, 4H), 7.68 (s, 1H), 7.82-7.86 (m, 2H), 8.14-8.17 (m, 2H), 9.43 (s, 1H).  $^{13}\text{C}$  NMR ( $(\text{CD}_3)_2\text{CO}$ , 300MHz)  $\delta$  20.2, 33.9, 45.8, 121.0, 124.3, 128.7, 129.1, 135.6, 136.1, 142.8, 146.0, 180.8. High-resolution (TOF) mass spectrum,  $\text{C}_{16}\text{H}_{18}\text{N}_3\text{O}_2\text{S}$  (MH $^+$ ) calcd, 316.1120, found 316.1116.

**1-(4-chlorophenethyl)-3-(4-nitrophenyl)thiourea (20):** yellow solid.  $^1\text{H}$  NMR ( $(\text{CD}_3)_2\text{CO}$ , 500 MHz)  $\delta$  2.99 (t, 2H,  $J = 7.5$  Hz), 3.88 (t, 2H,  $J = 7.5$  Hz), 7.28-7.33 (m, 3H), 7.77-7.87 (m, 3H), 8.13-8.15 (m, 1H), 9.48 (s, 1H).  $^{13}\text{C}$  NMR ( $(\text{CD}_3)_2\text{CO}$ , 500MHz)  $\delta$  33.7, 45.4, 120.9, 124.3, 128.5, 130.5, 131.6, 138.2, 142.9, 145.9, 180.8. High-resolution (TOF) mass spectrum,  $\text{C}_{15}\text{H}_{15}\text{N}_3\text{O}_2\text{ClS}$  (MH $^+$ ) calcd, 336.0574, found 336.0567.

**7-methyl-3,4-dihydroisoquinoline-1(2H)-thione (22):** oily yellow solid.  $^1\text{H}$  NMR ( $(\text{CD}_3)_2\text{CO}$ , 300MHz)  $\delta$  2.88 (s, 3H), 2.96 (t, 2H,  $J = 6.9$  Hz), 3.50-3.56 (m, 2H), 7.06-7.31 (m, 2H), 8.28-8.36 (m, 1H), 9.47 (s, 1H).  $^{13}\text{C}$  NMR ( $(\text{CD}_3)_2\text{CO}$ , 300MHz) two isomers  $\delta$  20.2, 20.5, 27.2, 27.5, 41.4, 41.5, 127.1, 127.4, 127.6, 130.5, 131.6, 131.7, 132.6, 132.7, 134.5, 136.1, 142.6, 193.1, 193.4. High-resolution mass spectrum,  $\text{C}_{10}\text{H}_{11}\text{NS}$  calcd, 177.06122, found 177.06087.

**N-(2-nitrophenyl)piperidine-1-carboxamide (25):**  $^1\text{H}$  NMR ( $\text{CDCl}_3$ , 300MHz)  $\delta$  1.64 (s, 6H), 3.51-3.53 (m, 4H), 6.99 (dt, 1H,  $J = 1.2, 7.2$  Hz), 7.54 (dt, 1H,  $J = 1.5, 7.2$  Hz), 8.13 (dd, 1H,  $J = 1.5, 8.7$  Hz), 8.57 (dd, 1H,  $J = 1.2, 8.57$  Hz), 10.15 (s, 1H).  $^{13}\text{C}$  NMR ( $\text{CDCl}_3$ , 300MHz)  $\delta$  24.3, 25.7, 45.2, 121.1, 121.4, 125.6, 135.4, 135.9, 137.6, 153.4. High-resolution mass spectrum,  $\text{C}_{12}\text{H}_{15}\text{O}_3\text{N}_3$  calcd, 249.11135, found 249.11220.

**2** (CDCl<sub>3</sub>)

δ (2nitrophenyl system)

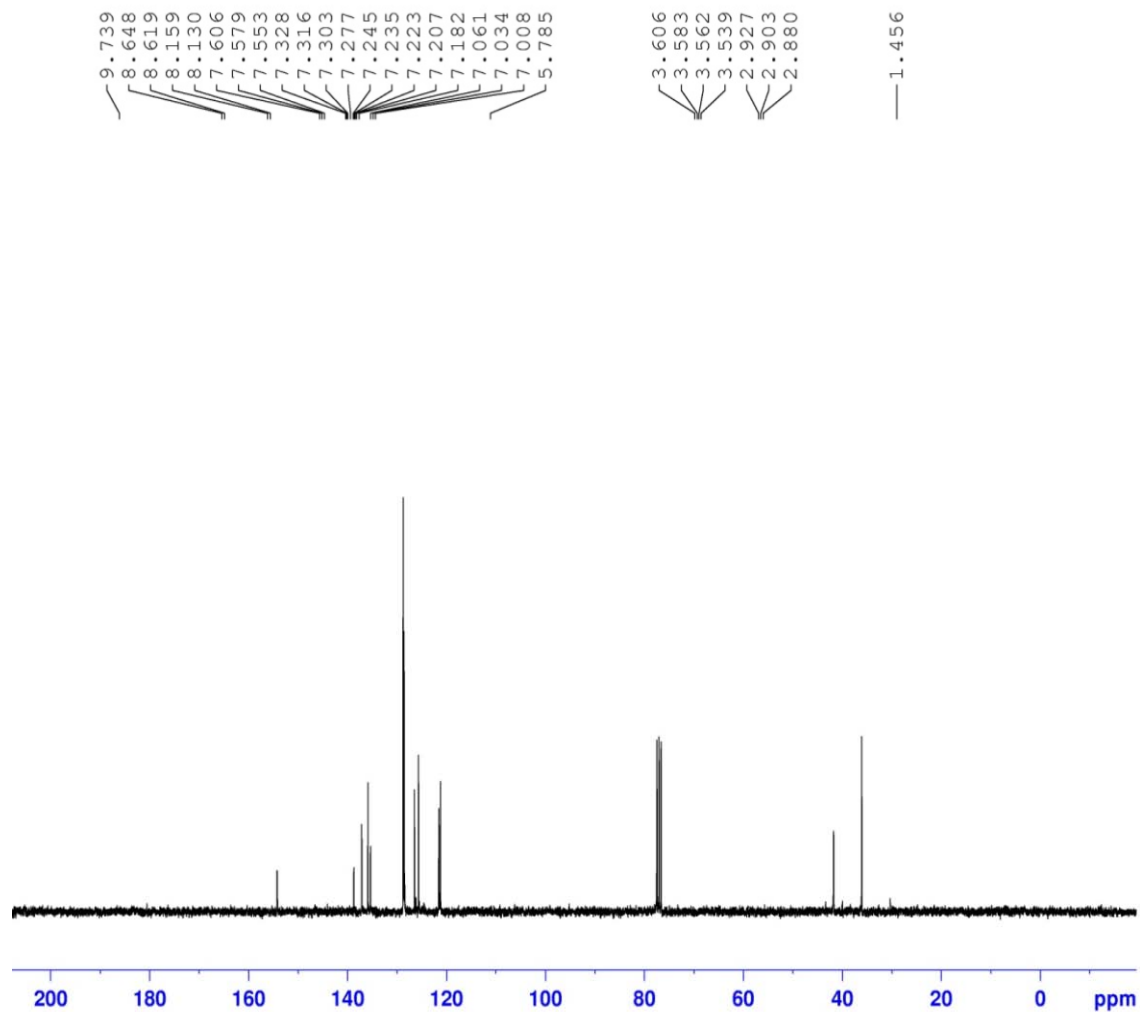

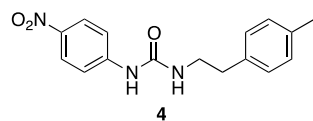

NB5 pg61 crude urea product

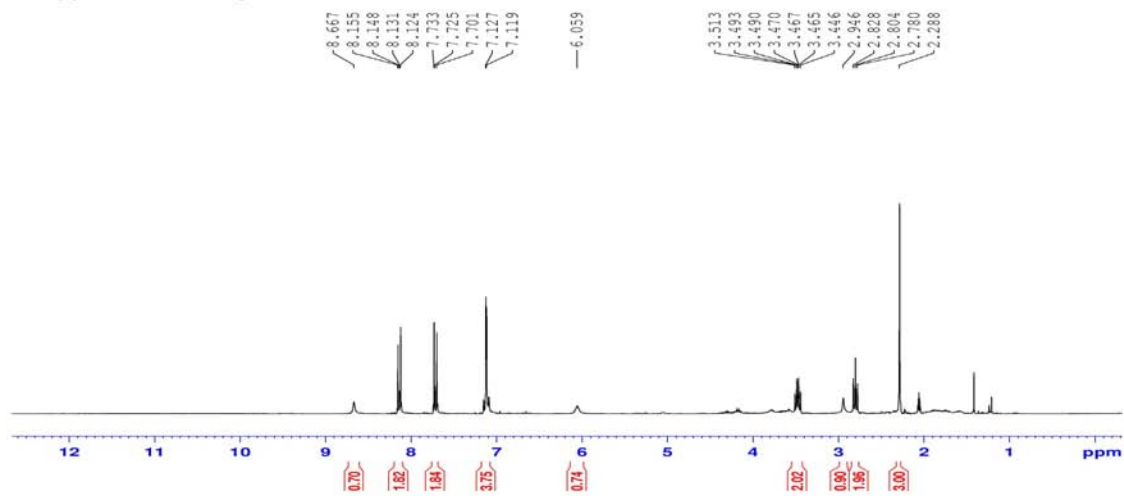

NB5 pg61 crude urea prod

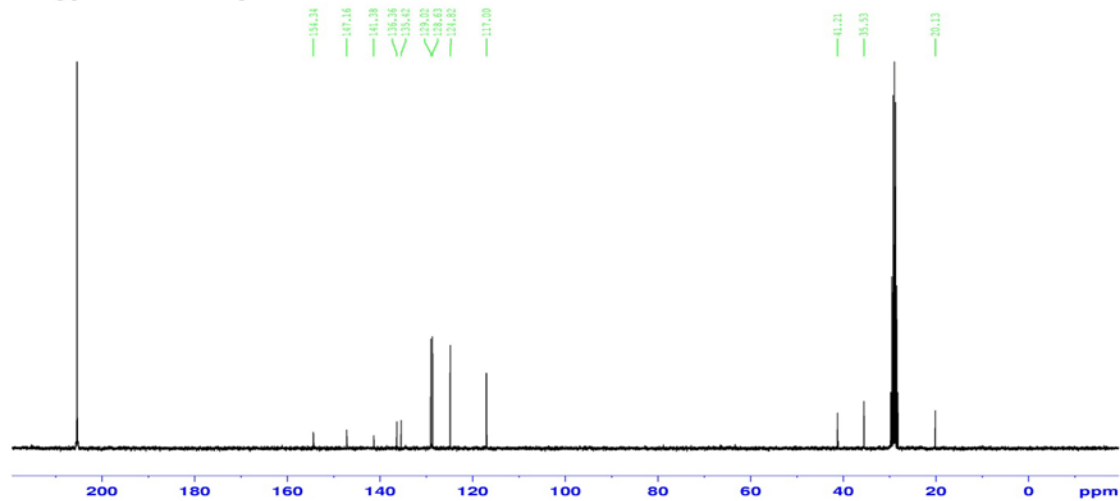

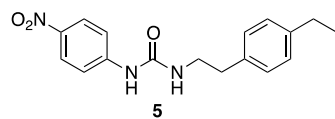

NB5 pg62 crude

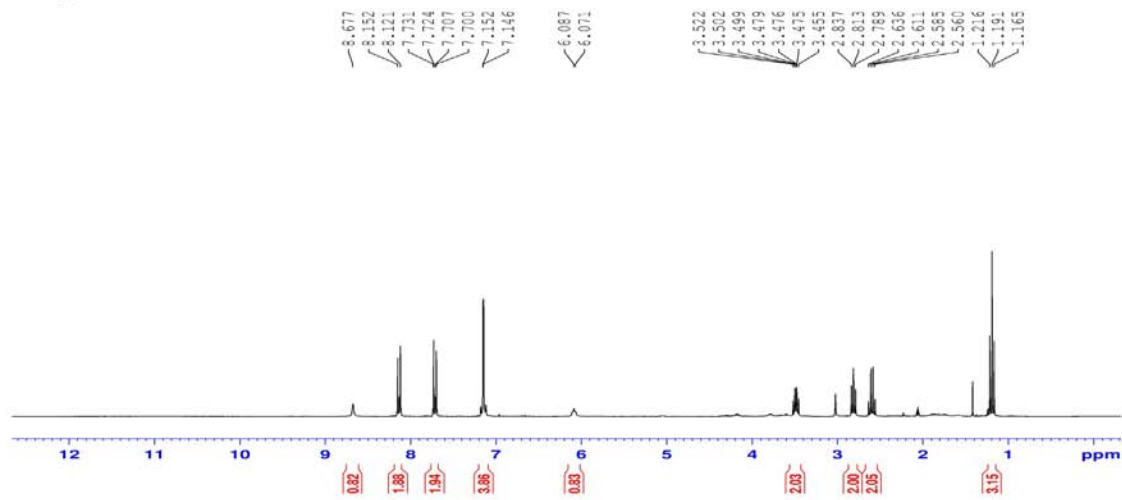

NB5 pg62 crude urea prod

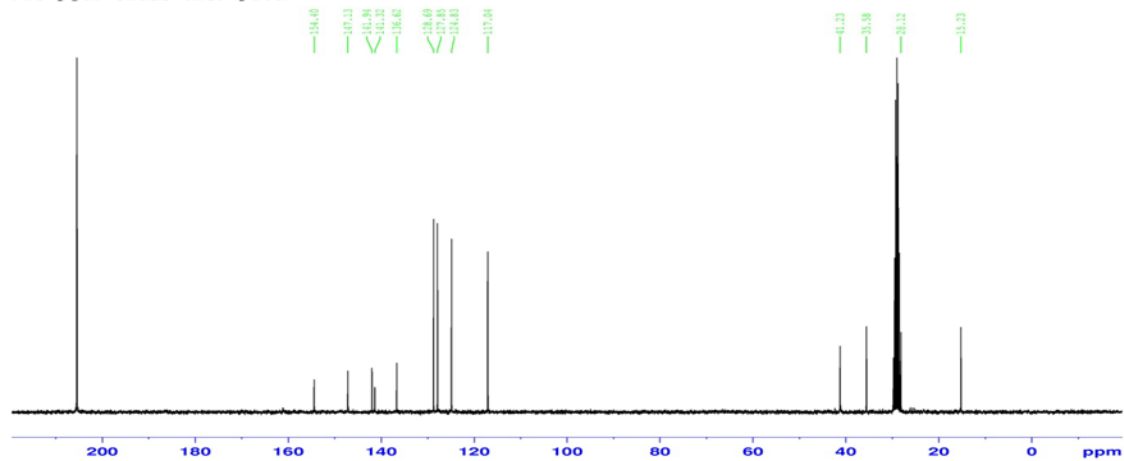

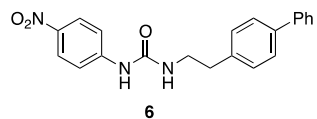

NB5 pg63 crude urea prod

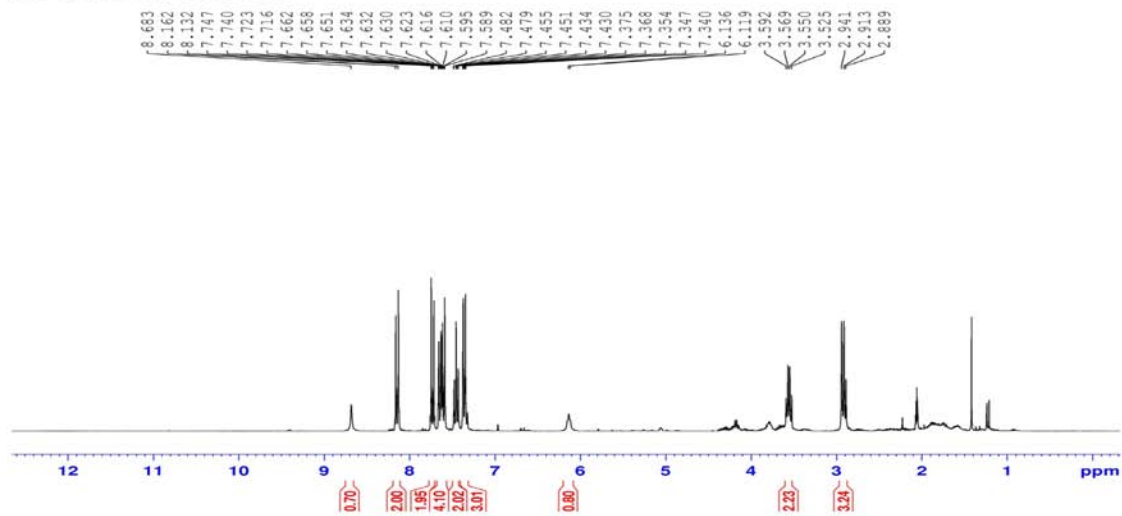

NB5 pg63 crude urea prod

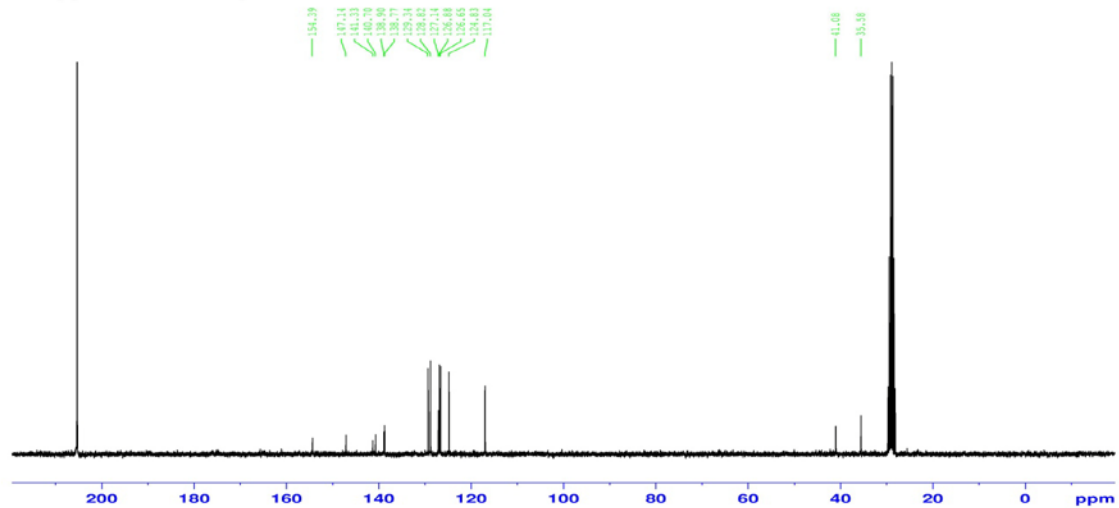



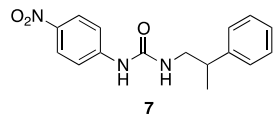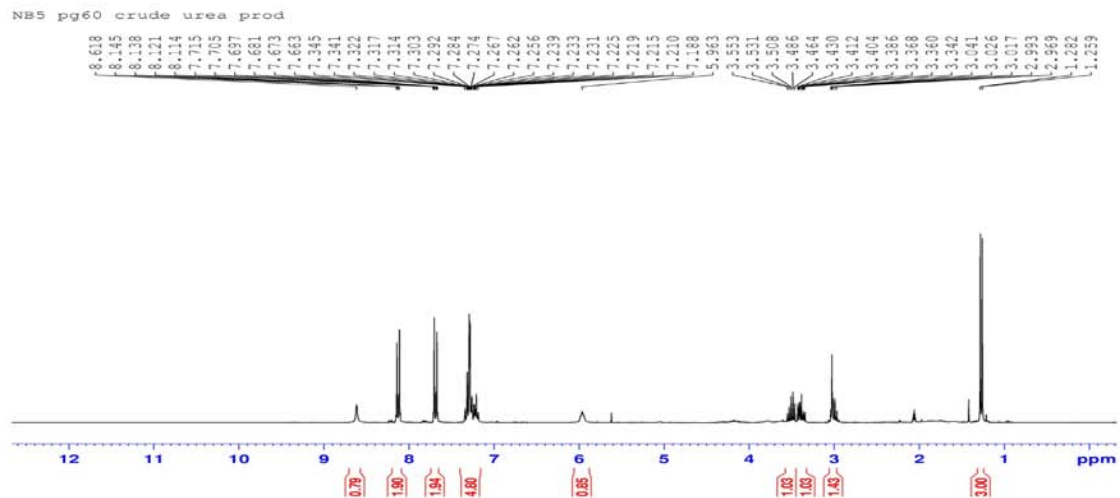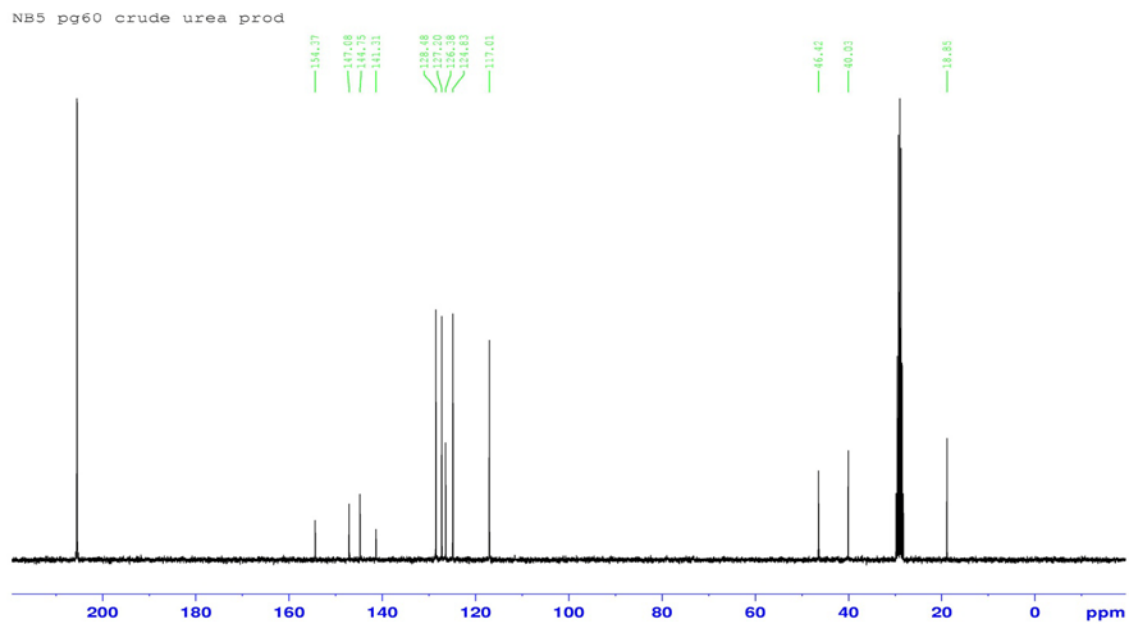

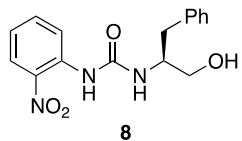

NB4 pg82 purified

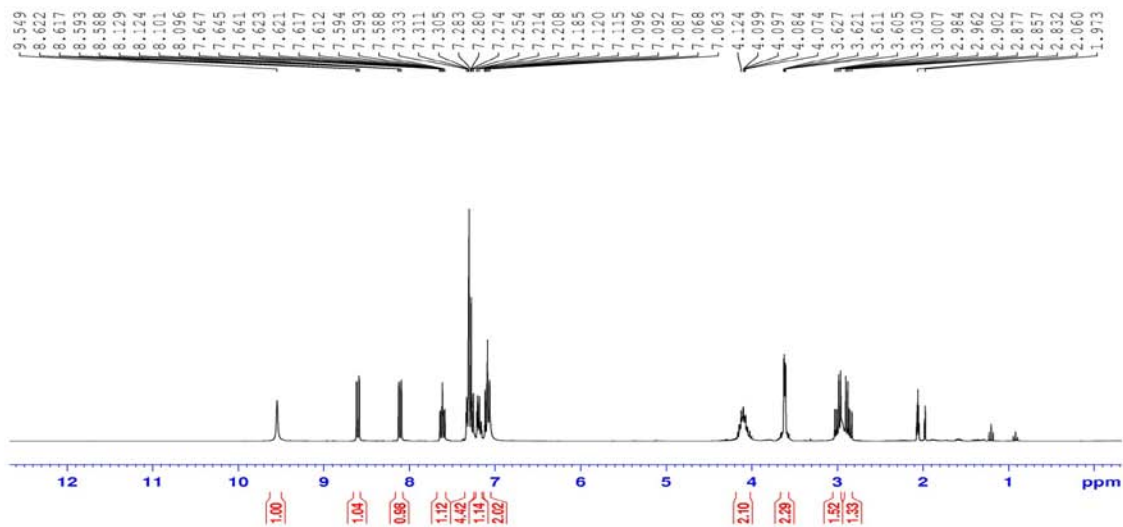

NB4 pg82 purified

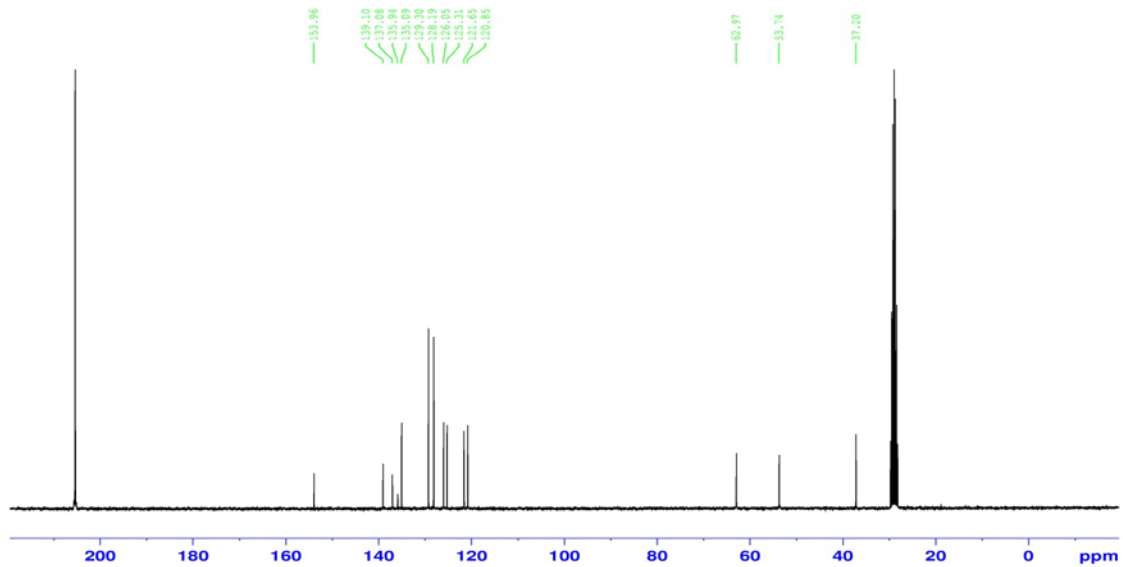

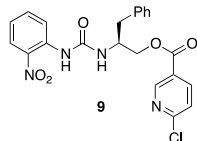

NB5 pg54 TfOH step purified n dried

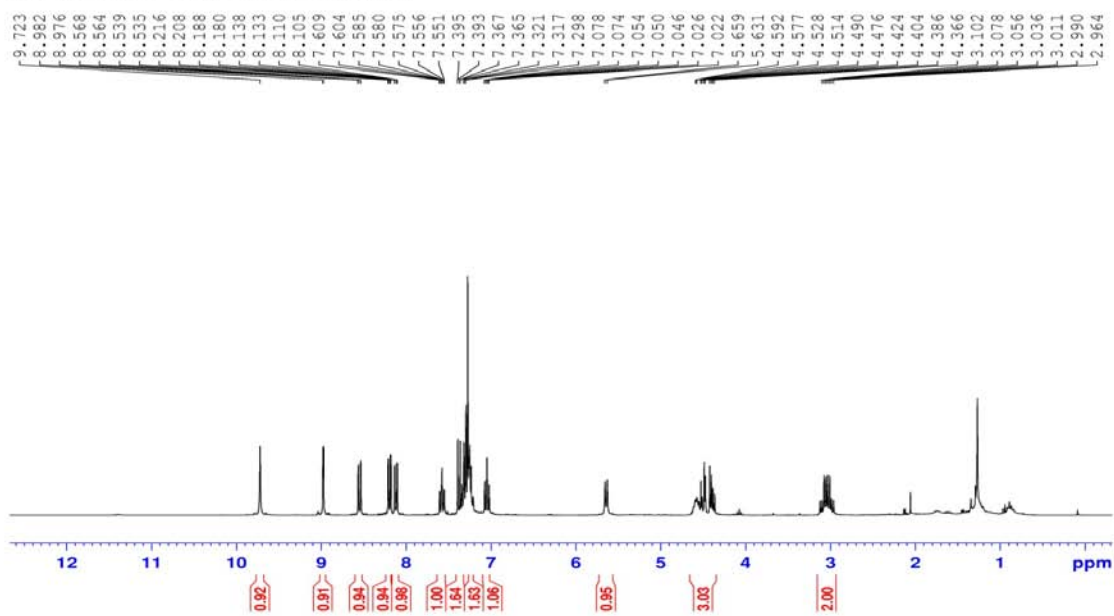

NB5 pg54 TfOH step purified n dried

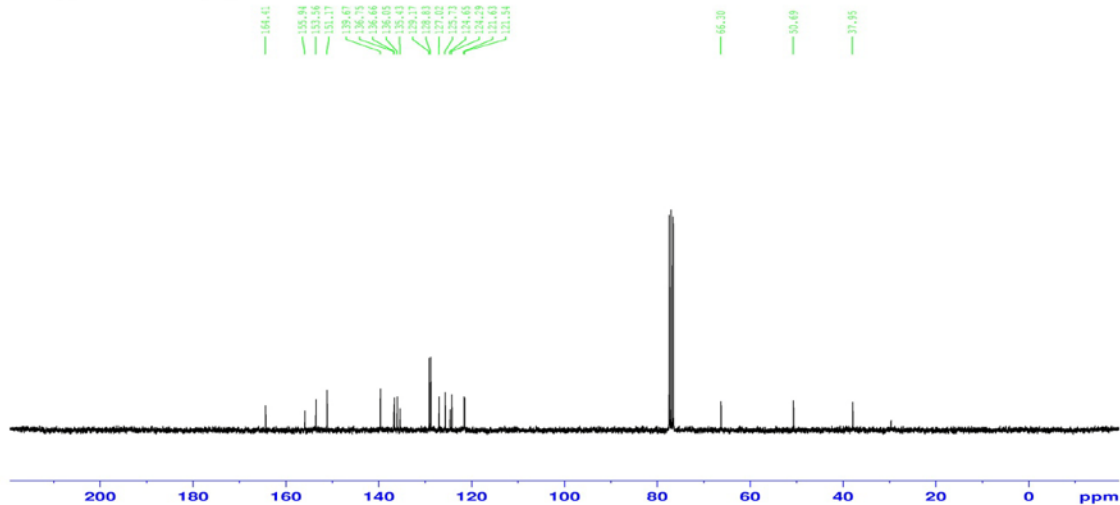

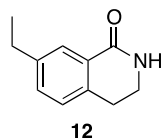

NB5 pg77 TfOH step purified

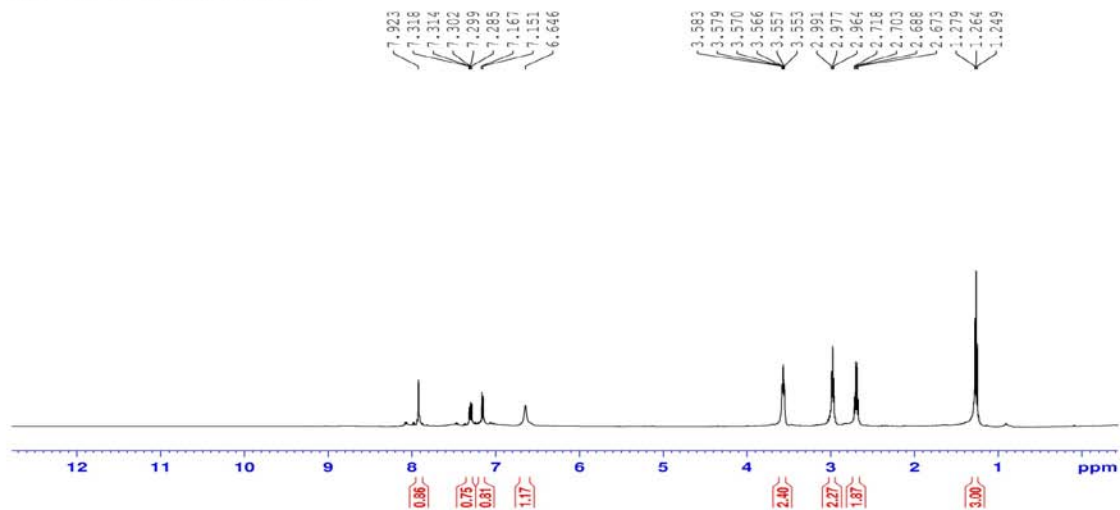

NB5 pg77 TfOH step purified prod

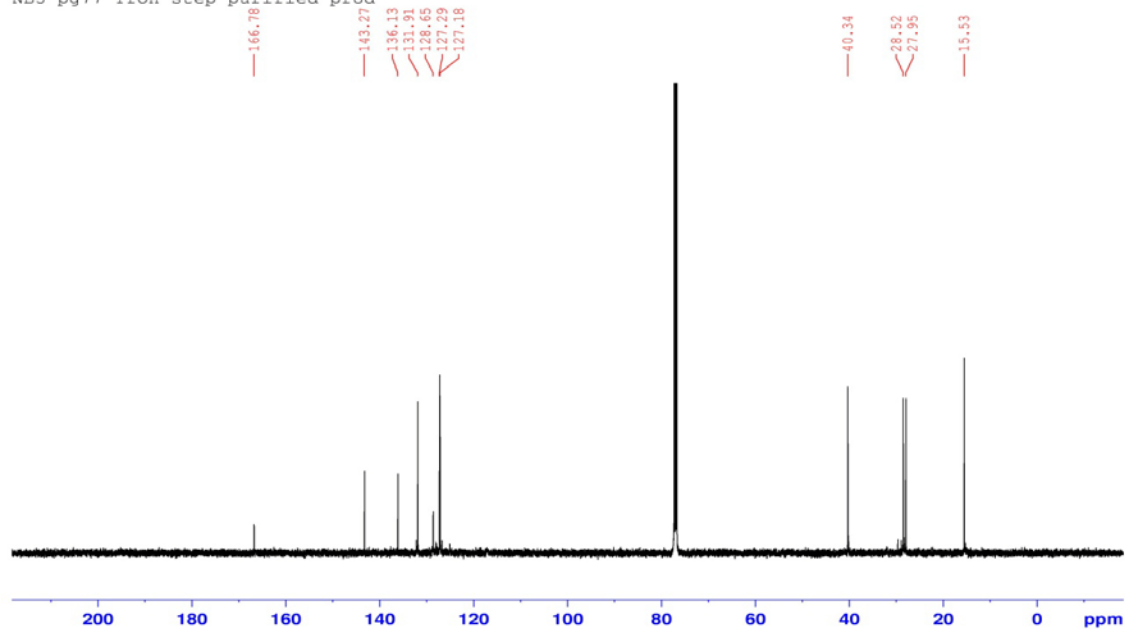

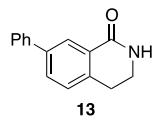

NBS pg80 TfOH step purified prod

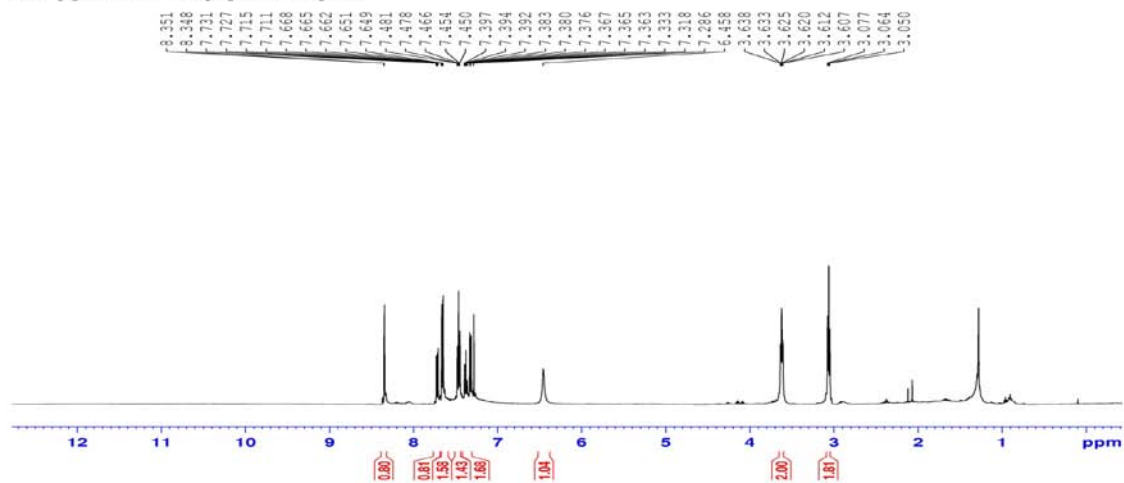

NBS pg80 TfOH step purified prod

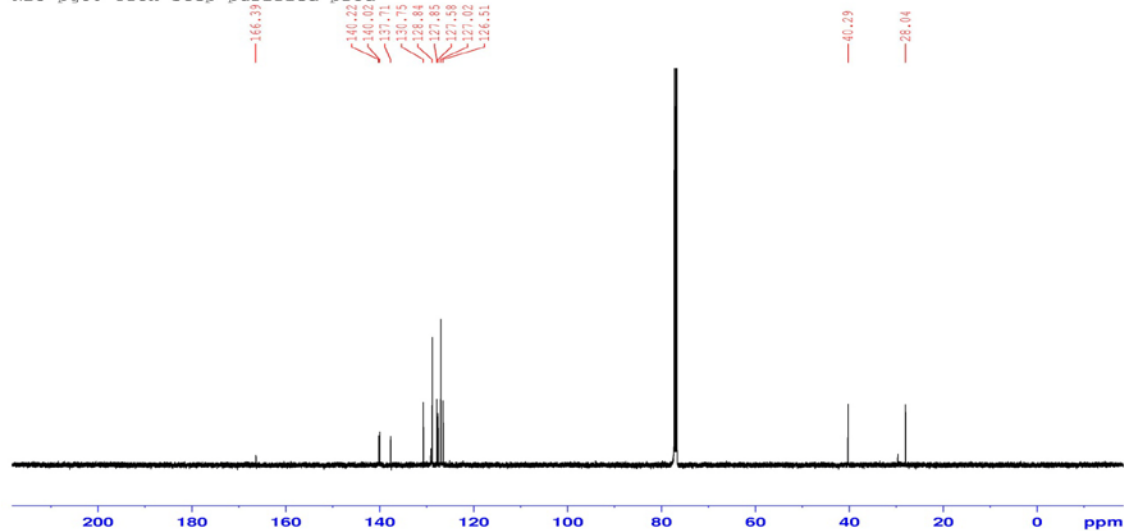

**16** (CDCl<sub>3</sub>)

i prod

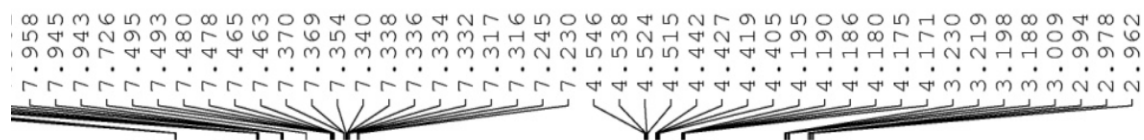

i76 purified prod

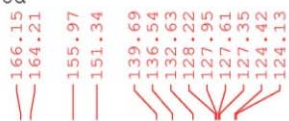

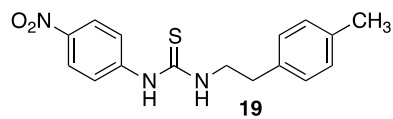

NB6 pg20 crude thiourea SM

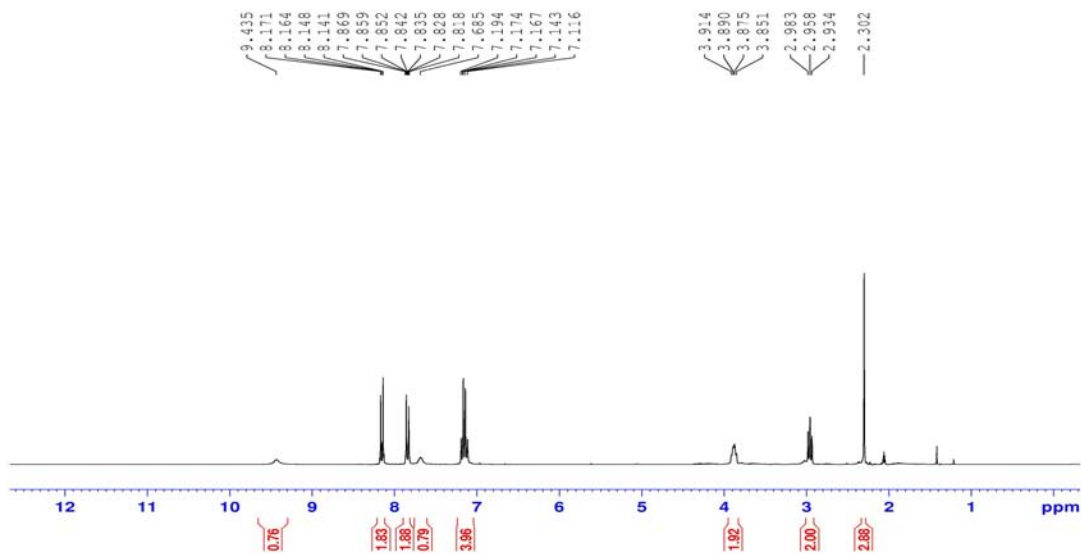

NB6 pg20 crude thiourea SM

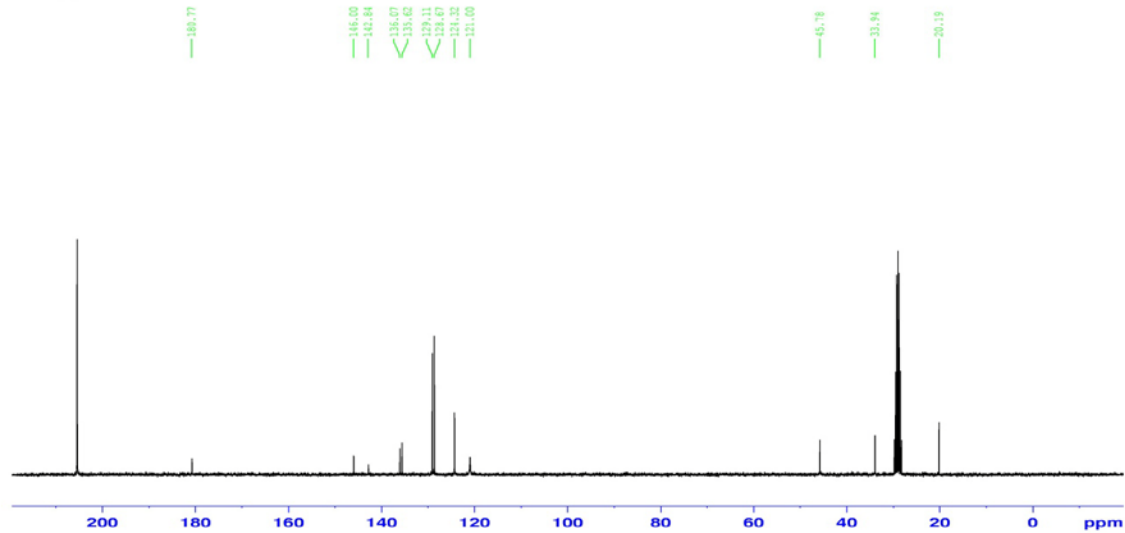

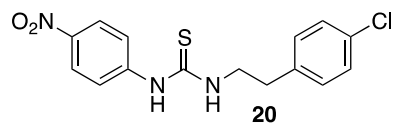

NB6 pg15 crude Cl-thiourea SM

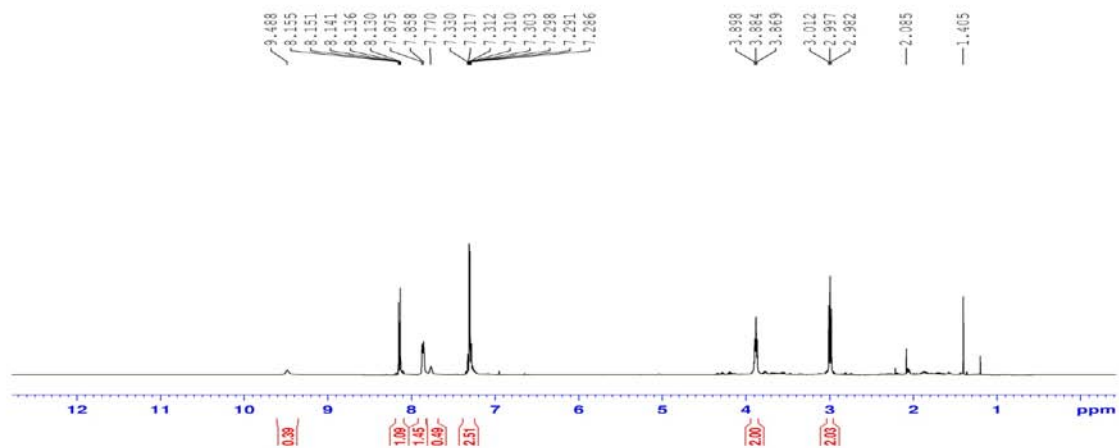

NB6 pg15 crude Cl-thiourea SM

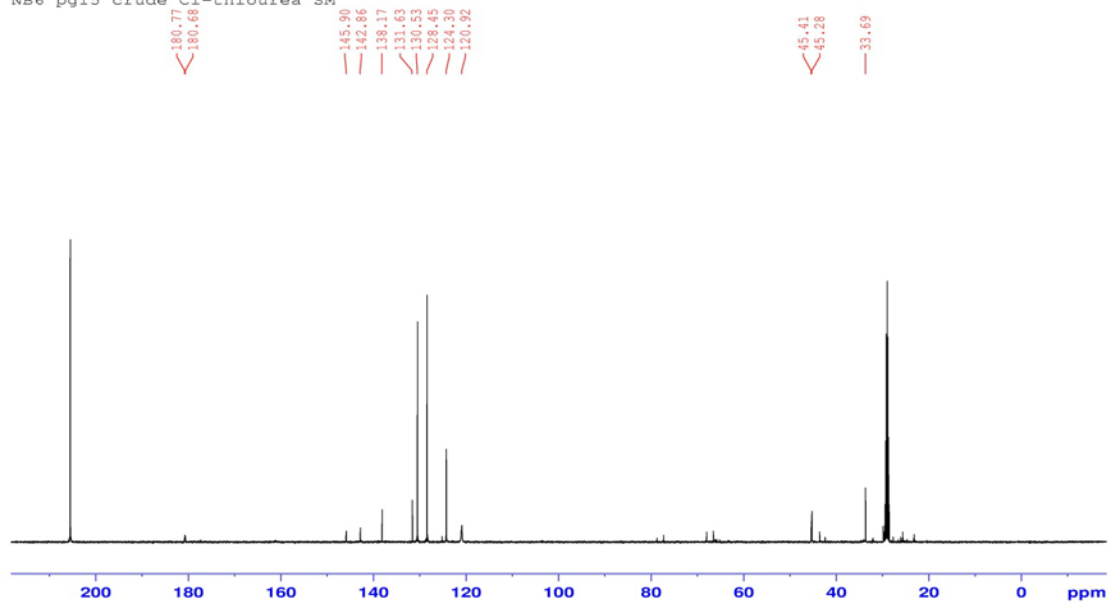



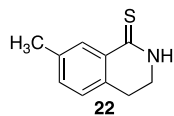

NB6 pg20 TfOH step purified

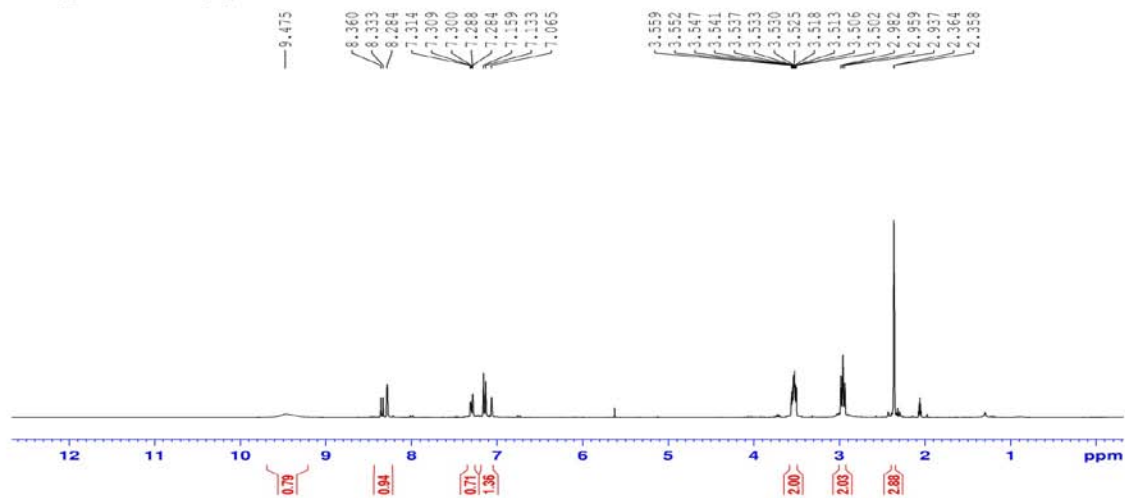

NB6 pg20 TfOH step purified

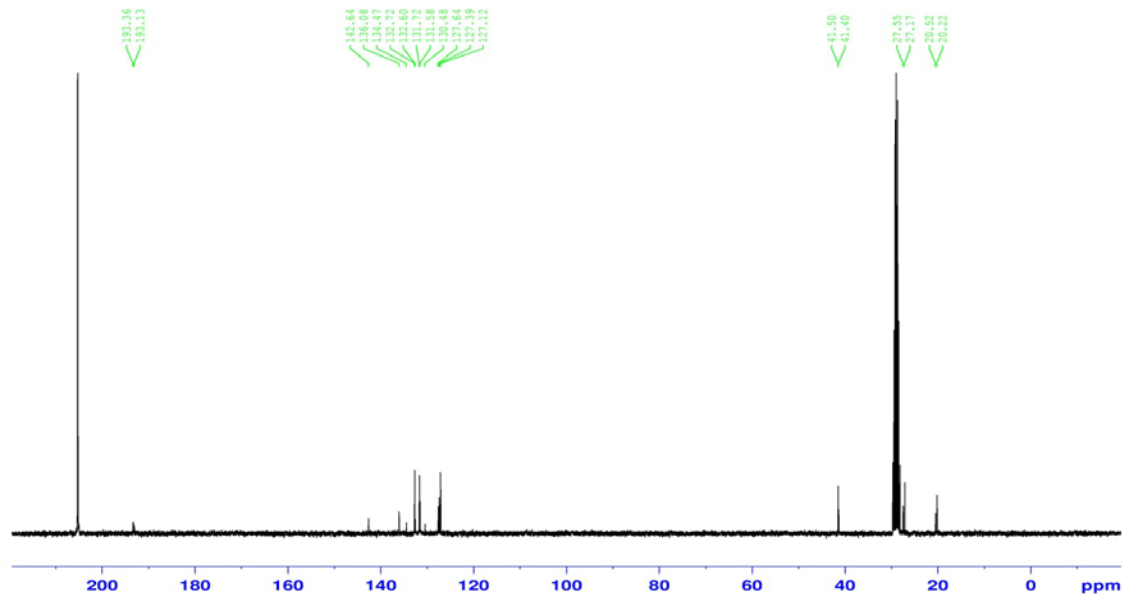

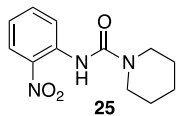

NB5 pg11 crude

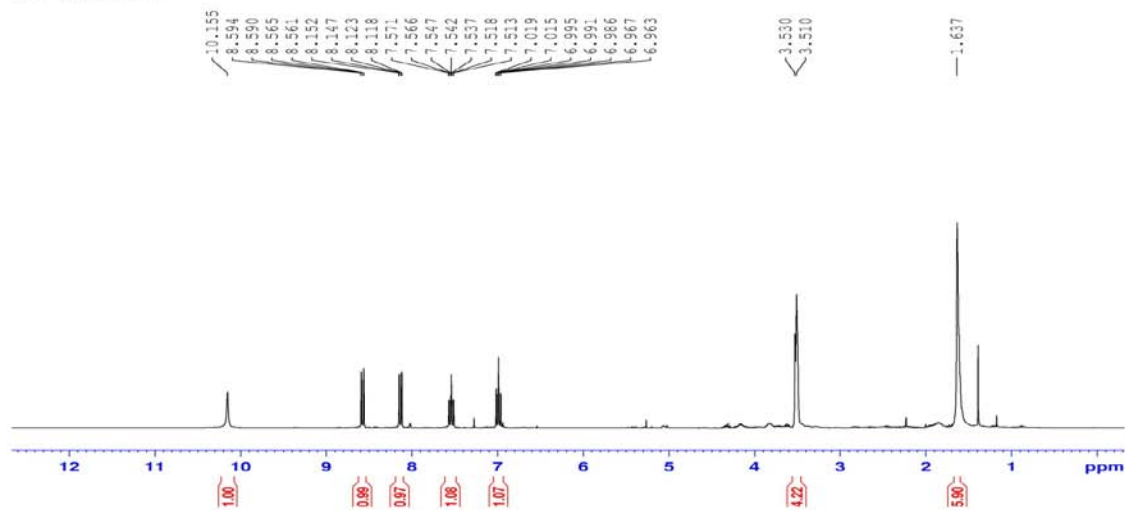

NB5 pg11 crude

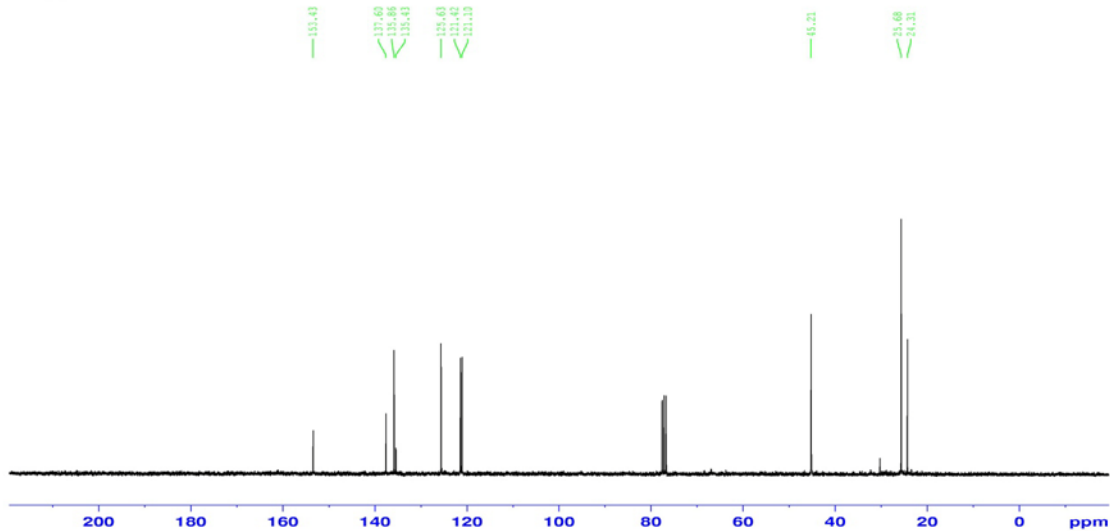

### Computational Methods:

In the mechanistic studies, intermediates and transition states were studied using density functional theory (DFT). Geometries were optimized in the gas phase at the M06/6-31G(d) level of theory<sup>1</sup> using Jaguar.<sup>2</sup> Gibbs' free energy corrections ( $\Delta G$ ) were calculated, and structures were verified to be minima or transition states by identifying the number of imaginary frequencies. In a second step, single-point energies were calculated using M06/cc-pVTZ(-f),<sup>3,4</sup> giving a basis set correction term ( $\Delta BS$ ). In a third step, solvent phase single point calculations were done at the M06/6-31G(d) level of theory. Using a Poisson-Boltzmann solver as implemented in Jaguar,<sup>5</sup> electrostatic solvation effects from the surroundings were calculated using the SCRF method with  $\text{CF}_3\text{SO}_3\text{H}$  as a solvent (dielectric constant = 77.4, probe radius = 2.5985274).<sup>6,7</sup> The free energy ( $\Delta G$ ) and basis set correction terms ( $\Delta BS$ ) were added to the solution phase energy to give the final energies reported in the paper.

1. Zhao, Y.; Truhlar, D. *Theor. Chem. Acc.* **2008**, *120*, 215–241.
2. Jaguar, version 7.7; Schrodinger, LLC: New York, 2010.
3. Dunning, T. H. *J. Chem. Phys.* **1989**, *90*, 1007–1023
4. Woon, D. E.; Dunning, T. H. *J. Chem. Phys.* **1993**, *98*, 1358–1371.
5. Marten, B.; Kim, K.; Cortis, C.; Friesner, R. A.; Murphy, R. B.; Ringnalda, M. N.; Sitkoff, D.; Honig, B. *J. Phys. Chem.* **1996**, *100*, 11775–11788.
6. Lira, A. L.; Zolotukhin, M.; Fomina, L.; Fomine, S. *J. Phys. Chem. A* **2007**, *111*, 13606–13610
7. Naredla, R. R.; Zheng, C.; Nilsson Lill, S. O.; and Klumpp, D. A. *J. Am. Chem. Soc.*, **2011**, *133*, 13169-13175

### Cartesian Coordinates

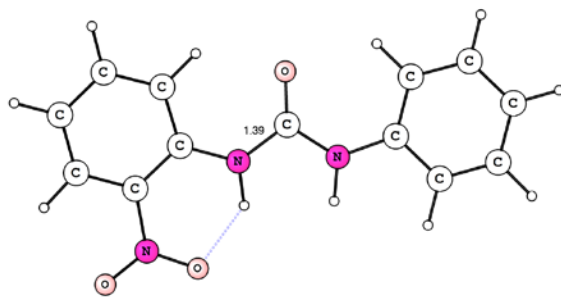

### Compound 24:

|                 |              |              |              |   |              |              |              |
|-----------------|--------------|--------------|--------------|---|--------------|--------------|--------------|
| E: -891.3006984 |              |              |              | 7 | -2.341784266 | -0.045125469 | -0.053340067 |
| 6               | 0.889300863  | -1.844899453 | 0.012229363  | 8 | -3.050191079 | -1.035559880 | -0.066888027 |
| 6               | 1.803945578  | -0.791423221 | 0.037642541  | 8 | -2.808747749 | 1.100443804  | -0.066683034 |
| 6               | -0.455768160 | -1.552634377 | -0.016638566 | 1 | 1.226287368  | -2.878192051 | 0.014887079  |
| 1               | 2.872160383  | -1.000314248 | 0.060449889  | 6 | -0.055360018 | 5.797591444  | 0.000774669  |
| 1               | -1.206782571 | -2.335530813 | -0.037254100 | 6 | -1.074172870 | 6.745618528  | -0.126660776 |
| 6               | 1.388680183  | 0.525590971  | 0.034484376  | 6 | 1.268987750  | 6.221133347  | 0.131471379  |
| 6               | -0.896286859 | -0.225880996 | -0.020707478 | 6 | -0.778644673 | 8.099905508  | -0.124781604 |
| 1               | 2.107984936  | 1.334939384  | 0.055895584  | 6 | 1.547531268  | 7.582717166  | 0.130016151  |
| 6               | 0.022412239  | 0.856350041  | 0.005112716  | 6 | 0.537772246  | 8.528731151  | 0.003265551  |
| 7               | -0.414576769 | 2.166996884  | -0.001899825 | 1 | -2.108895369 | 6.414085689  | -0.228564940 |
| 1               | -1.428705692 | 2.241438740  | -0.024292984 | 1 | 2.061923371  | 5.489111555  | 0.229527231  |
| 6               | 0.354661365  | 3.329577561  | 0.034170319  | 1 | -1.586101373 | 8.822911531  | -0.225283867 |
| 8               | 1.568244348  | 3.357509430  | 0.094041746  | 1 | 2.582746237  | 7.904637167  | 0.231774784  |
| 7               | -0.449234729 | 4.446093356  | -0.004088089 | 1 | 0.773526349  | 9.590981562  | 0.004278585  |
| 1               | -1.447749709 | 4.302602861  | -0.086429157 |   |              |              |              |

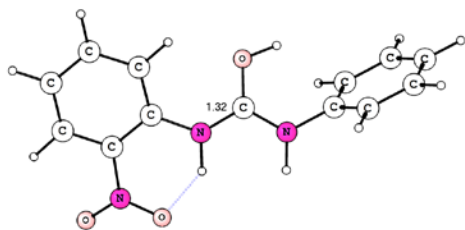

Compound **36**:

|                     |              |              |              |   |              |              |              |
|---------------------|--------------|--------------|--------------|---|--------------|--------------|--------------|
| E: -891.65032795426 |              |              |              | 7 | -2.143692412 | -0.095382698 | 0.701529573  |
| 6                   | 1.005214135  | -1.700441923 | -0.437542063 | 8 | -2.613504733 | -1.057677922 | 1.260191390  |
| 6                   | 1.729081876  | -0.617152124 | -0.919272348 | 8 | -2.752347046 | 0.974426040  | 0.562887649  |
| 6                   | -0.257035442 | -1.493269099 | 0.091900326  | 1 | 1.416702685  | -2.704948523 | -0.481636732 |
| 1                   | 2.715454502  | -0.768331402 | -1.351491889 | 6 | -0.219043280 | 5.802163469  | -0.050639227 |
| 1                   | -0.856628370 | -2.316087348 | 0.469556953  | 6 | -0.402051402 | 6.691494733  | -1.105736614 |
| 6                   | 1.207047485  | 0.669003874  | -0.870372156 | 6 | 0.498534386  | 6.161814855  | 1.090392612  |
| 6                   | -0.788927374 | -0.209992650 | 0.145981956  | 6 | 0.140873757  | 7.966035418  | -1.009571942 |
| 1                   | 1.783657453  | 1.496861844  | -1.266545178 | 6 | 1.054317138  | 7.434375516  | 1.162938562  |
| 6                   | -0.054042240 | 0.897217498  | -0.328394538 | 6 | 0.871005781  | 8.333298613  | 0.117732942  |
| 7                   | -0.632652259 | 2.188491752  | -0.269908023 | 1 | -0.963945953 | 6.385544970  | -1.986521386 |
| 1                   | -1.643930623 | 2.133156996  | -0.078432806 | 1 | 0.592015801  | 5.461156394  | 1.920167837  |
| 6                   | -0.053739571 | 3.378915728  | -0.225092320 | 1 | -0.000919877 | 8.673803325  | -1.822665058 |
| 8                   | 1.248273533  | 3.460313881  | -0.268697704 | 1 | 1.615775169  | 7.727422077  | 2.046685823  |
| 7                   | -0.793875769 | 4.484968625  | -0.132856945 | 1 | 1.297388005  | 9.331662139  | 0.183068722  |
| 1                   | -1.805461920 | 4.388057794  | -0.142820719 | 1 | 1.535142307  | 4.397915598  | -0.224408988 |

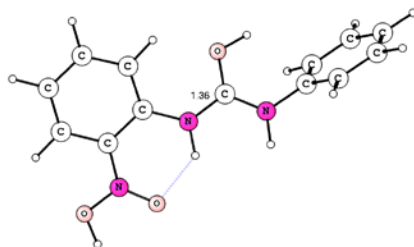

Compound **37**:

|                 |              |              |              |   |              |              |              |
|-----------------|--------------|--------------|--------------|---|--------------|--------------|--------------|
| E: -891.8650147 |              |              |              | 8 | -2.595731357 | -1.245446590 | 1.168445075  |
| 6               | 1.015711230  | -1.680132329 | -0.452792476 | 8 | -2.760155749 | 0.885978537  | 0.736013129  |
| 6               | 1.703818004  | -0.551443197 | -0.919707880 | 1 | 1.462771530  | -2.667751441 | -0.520430973 |
| 6               | -0.241309430 | -1.525644448 | 0.067739220  | 6 | -0.199406263 | 5.837371278  | -0.092405610 |
| 1               | 2.691163991  | -0.670035164 | -1.362247703 | 6 | -0.384573663 | 6.728094675  | -1.145447047 |
| 1               | -0.809559610 | -2.385389432 | 0.408914283  | 6 | 0.519306046  | 6.177887148  | 1.055109613  |
| 6               | 1.157081789  | 0.727092921  | -0.853856246 | 6 | 0.173332601  | 7.995543232  | -1.042400591 |
| 6               | -0.817799461 | -0.230066615 | 0.145392741  | 6 | 1.084134898  | 7.446249993  | 1.130647176  |
| 1               | 1.725811392  | 1.562664261  | -1.243181111 | 6 | 0.908446511  | 8.349812396  | 0.086930266  |
| 6               | -0.104050793 | 0.937029124  | -0.313852414 | 1 | -0.952461831 | 6.436669339  | -2.027396744 |
| 7               | -0.682233987 | 2.205225361  | -0.220535370 | 1 | 0.596937270  | 5.482573576  | 1.891455625  |
| 1               | -1.688409487 | 2.219108679  | -0.067017064 | 1 | 0.036714057  | 8.709095862  | -1.851087777 |
| 6               | -0.073801531 | 3.418021523  | -0.197310006 | 1 | 1.643760224  | 7.733951897  | 2.017153724  |
| 8               | 1.220855649  | 3.449621998  | -0.164689191 | 1 | 1.342488073  | 9.344427442  | 0.156706562  |
| 7               | -0.796103355 | 4.519699348  | -0.181930734 | 1 | -3.505533082 | -1.018689631 | 1.481892672  |
| 1               | -1.807889515 | 4.453634007  | -0.279890649 | 1 | 1.546328448  | 4.382049149  | -0.137412058 |
| 7               | -2.087591206 | -0.118640742 | 0.676068945  |   |              |              |              |

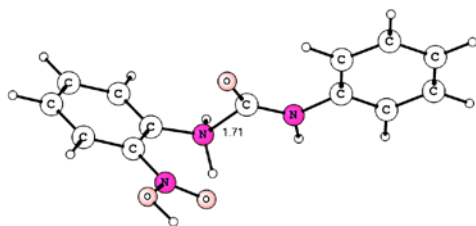

Compound **38**:

|                 |              |              |             |   |              |              |              |
|-----------------|--------------|--------------|-------------|---|--------------|--------------|--------------|
| E: -891.8227687 |              |              |             | 8 | -2.521562712 | 0.264695738  | -0.622604323 |
| 6               | 0.175350474  | -1.403155242 | 1.868528662 | 8 | -2.618386727 | 2.136528951  | 0.510551003  |
| 6               | 0.761351719  | -0.620649682 | 2.861400659 | 1 | 0.463152968  | -2.444207614 | 1.748465090  |
| 6               | -0.777813341 | -0.855195255 | 1.031808366 | 6 | -0.158309911 | 5.883736866  | 0.234764340  |
| 1               | 1.512964429  | -1.050663227 | 3.520114395 | 6 | -0.620386643 | 7.156511988  | 0.572090394  |
| 1               | -1.247916943 | -1.455379783 | 0.257680491 | 6 | 0.647399800  | 5.659668598  | -0.879834887 |
| 6               | 0.403746237  | 0.725648084  | 3.024081197 | 6 | -0.275088891 | 8.229517228  | -0.231489420 |
| 6               | -1.149347079 | 0.491861646  | 1.200743611 | 6 | 0.984816047  | 6.749453368  | -1.669144013 |
| 1               | 0.894070848  | 1.320016320  | 3.794247344 | 6 | 0.528920104  | 8.028439415  | -1.352307821 |
| 6               | -0.552283454 | 1.292007873  | 2.215757514 | 1 | -1.248065378 | 7.309178200  | 1.450782376  |
| 7               | -0.835242755 | 2.706126981  | 2.348089508 | 1 | 1.011263774  | 4.667813116  | -1.130914421 |
| 1               | -1.845925507 | 2.888559834  | 2.411290109 | 1 | -0.632929324 | 9.225161062  | 0.017468769  |
| 6               | -0.226410430 | 3.555416195  | 0.998519913 | 1 | 1.614647910  | 6.597999836  | -2.542069147 |
| 8               | 0.355482036  | 2.872294950  | 0.227015495 | 1 | 0.803896068  | 8.872426053  | -1.980039711 |
| 7               | -0.564957507 | 4.822025926  | 1.116859242 | 1 | -3.235303097 | 0.758660803  | -1.097206760 |
| 1               | -1.126727349 | 5.124988437  | 1.908036219 | 1 | -0.389936537 | 3.061418766  | 3.204408706  |
| 7               | -2.125706609 | 1.042005964  | 0.375226809 |   |              |              |              |

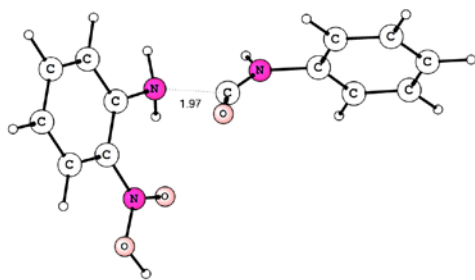

Compound **39**:

|                   |              |              |              |   |              |              |              |
|-------------------|--------------|--------------|--------------|---|--------------|--------------|--------------|
| E: : -891.8215457 |              |              |              | 8 | -3.007656998 | 0.237419606  | -0.210703344 |
| 6                 | 0.250284428  | -1.321034475 | 1.525531509  | 8 | -2.841900240 | 2.159606766  | 0.810824342  |
| 6                 | 1.021250925  | -0.525233187 | 2.378437011  | 1 | 0.535943611  | -2.349925375 | 1.324369094  |
| 6                 | -0.878196779 | -0.794020411 | 0.941546079  | 6 | 0.131621558  | 6.041380243  | 0.139188336  |
| 1                 | 1.914102768  | -0.938843000 | 2.843585876  | 6 | -0.828541513 | 7.003548322  | -0.143740614 |
| 1                 | -1.492482024 | -1.397459933 | 0.279670372  | 6 | 1.386884045  | 6.021769481  | -0.452003108 |
| 6                 | 0.668466626  | 0.799148273  | 2.650213977  | 6 | -0.498320808 | 8.002318681  | -1.050548440 |
| 6                 | -1.241403006 | 0.545245626  | 1.214600606  | 6 | 1.690659818  | 7.020807444  | -1.368248007 |
| 1                 | 1.293048649  | 1.392601628  | 3.316750847  | 6 | 0.752669805  | 8.006126445  | -1.662556890 |
| 6                 | -0.463280546 | 1.361483748  | 2.094135997  | 1 | -1.807257627 | 6.979860220  | 0.332276712  |
| 7                 | -0.738651014 | 2.734134003  | 2.338993521  | 1 | 2.115948972  | 5.253792715  | -0.198196766 |
| 1                 | -1.735810262 | 2.936043630  | 2.456231515  | 1 | -1.225045901 | 8.776221559  | -1.284570256 |
| 6                 | -0.203378772 | 3.758661546  | 0.738481932  | 1 | 2.666912652  | 7.033194517  | -1.846084000 |
| 8                 | -0.008443344 | 3.000025234  | -0.125151943 | 1 | 0.999205099  | 8.787613062  | -2.377363453 |
| 7                 | -0.205773988 | 4.998468671  | 1.114996770  | 1 | -3.805592306 | 0.721784843  | -0.538990796 |
| 1                 | -0.462281632 | 5.261637361  | 2.062858319  | 1 | -0.229636868 | 3.051249463  | 3.169568426  |
| 7                 | -2.387841649 | 1.060576063  | 0.625050388  |   |              |              |              |



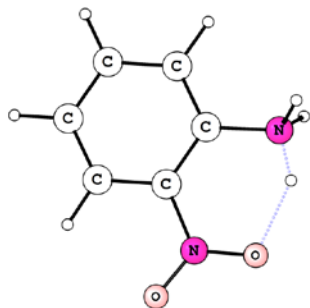

Compound 40:

E: -492.1410439

|   |              |              |              |
|---|--------------|--------------|--------------|
| 6 | 1.016460651  | -1.594483608 | -0.485404122 |
| 6 | 1.719245462  | -0.484370504 | -0.936803749 |
| 6 | -0.254330228 | -1.445995855 | 0.054324934  |
| 1 | 2.713935795  | -0.599236013 | -1.359808350 |
| 1 | -0.822917057 | -2.299529656 | 0.413283780  |
| 6 | 1.153663669  | 0.785614832  | -0.850669864 |
| 6 | -0.823007579 | -0.183072273 | 0.142809870  |
| 1 | 1.703500537  | 1.657425858  | -1.203634630 |
| 6 | -0.110738160 | 0.933583050  | -0.313292958 |
| 7 | -2.173813102 | -0.091628207 | 0.723833818  |
| 8 | -2.694880152 | 1.029684832  | 0.807452595  |
| 8 | -2.704071276 | -1.107734809 | 1.087794449  |
| 1 | 1.457139283  | -2.585587237 | -0.552390409 |
| 7 | -0.685803237 | 2.289082513  | -0.233216907 |
| 1 | -0.780448987 | 2.724208790  | -1.159447278 |
| 1 | -1.642357875 | 2.179123914  | 0.198210123  |
| 1 | -0.120466148 | 2.914533950  | 0.354558677  |

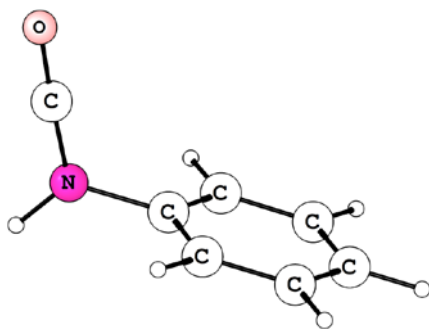

Compound **41**:

E: -399.7660422

|   |              |             |              |
|---|--------------|-------------|--------------|
| 6 | 0.241661923  | 3.543889282 | -0.396435650 |
| 8 | 0.609668896  | 2.908692083 | -1.268421979 |
| 7 | -0.145501054 | 4.300425503 | 0.541920830  |
| 1 | -0.601717114 | 3.903033801 | 1.369377155  |
| 6 | 0.095222028  | 5.758589856 | 0.368956768  |
| 6 | -0.901755328 | 6.514265064 | -0.230308180 |
| 6 | 1.302920779  | 6.273888613 | 0.816348521  |
| 6 | -0.671030600 | 7.877159301 | -0.369062304 |
| 6 | 1.508121309  | 7.639528266 | 0.664579023  |
| 6 | 0.526580911  | 8.432029634 | 0.075033740  |
| 1 | -1.830148919 | 6.058083619 | -0.567560252 |
| 1 | 2.052850608  | 5.634596381 | 1.277599567  |
| 1 | -1.430175215 | 8.504992809 | -0.828303573 |
| 1 | 2.439399531  | 8.082839185 | 1.007469674  |
| 1 | 0.698555538  | 9.499364554 | -0.042346716 |

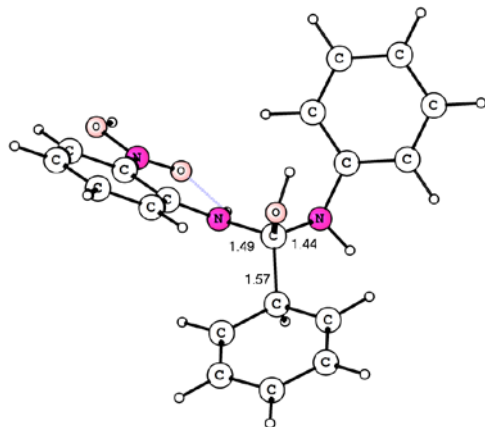

Compound 42:

|                 |              |             |              |   |              |             |              |
|-----------------|--------------|-------------|--------------|---|--------------|-------------|--------------|
| E: -1123.895825 |              |             |              | 6 | 3.585152183  | 2.933966888 | 1.459707590  |
| 6               | 0.688382593  | 8.857576435 | -4.319874680 | 6 | 4.273585616  | 4.616561868 | -0.115977685 |
| 6               | -0.006522211 | 8.606948833 | -3.113575024 | 6 | 4.528908514  | 3.857583303 | 1.019612666  |
| 6               | 1.317119661  | 7.830339584 | -4.951020806 | 1 | 1.636498236  | 2.074434156 | 1.145474924  |
| 1               | -0.502670447 | 9.433178206 | -2.607555388 | 1 | 2.919808341  | 5.007273761 | -1.743599571 |
| 1               | 1.859409929  | 7.993095573 | -5.876355215 | 1 | 3.782190841  | 2.332350155 | 2.343874720  |
| 6               | -0.081459479 | 7.353456714 | -2.555011614 | 1 | 5.013921026  | 5.329117399 | -0.472773599 |
| 6               | 1.265485901  | 6.517314848 | -4.394600981 | 1 | 5.464996480  | 3.980127655 | 1.558594321  |
| 1               | -0.598224381 | 7.214478867 | -1.612844007 | 1 | 3.089964203  | 5.082893635 | -6.430303299 |
| 6               | 0.537829285  | 6.239083401 | -3.166413733 | 1 | 1.168102370  | 5.626333395 | -0.099287456 |
| 7               | 0.457768889  | 4.990845911 | -2.656935942 | 6 | -3.020349020 | 4.213600773 | 0.690530777  |
| 1               | 0.931930118  | 4.247636921 | -3.164708496 | 6 | -3.887747067 | 4.991707748 | -0.096516975 |
| 6               | 0.087322462  | 4.546336626 | -1.283129243 | 6 | -1.818068311 | 3.826914702 | 0.172320776  |
| 8               | 0.226785078  | 5.562857899 | -0.362552369 | 1 | -4.838410294 | 5.313063044 | 0.329239539  |
| 7               | 0.889703210  | 3.378568926 | -1.049043109 | 1 | -1.113354040 | 3.273444734 | 0.793070901  |
| 1               | 0.379501451  | 2.560283323 | -0.735021538 | 6 | -3.563598565 | 5.385184219 | -1.410314866 |
| 7               | 1.959759522  | 5.520686714 | -5.022172645 | 6 | -1.430436923 | 4.138342542 | -1.215720486 |
| 8               | 2.664445217  | 5.907458254 | -6.098397554 | 1 | -4.265514800 | 5.987863826 | -1.980765936 |
| 8               | 2.015750764  | 4.348202410 | -4.707064170 | 1 | -1.472122540 | 3.176733424 | -1.783792045 |
| 1               | 0.721304907  | 9.860308319 | -4.735889193 | 6 | -2.368603995 | 5.004498962 | -1.948404559 |
| 6               | 2.127606367  | 3.540969267 | -0.359334146 | 1 | -2.113920858 | 5.279562668 | -2.970901327 |
| 6               | 2.380364401  | 2.787274318 | 0.786013641  | 1 | -3.297705387 | 3.953603269 | 1.708702074  |
| 6               | 3.082919418  | 4.453708223 | -0.817848835 |   |              |             |              |
